# Supplementary material for: Reduced Serum Butyrylcholinesterase Activity Indicates Severe Systemic Inflammation in Critically Ill Patients
Source: Hindawi journal article supplement (doi:10.1155/2015/274607), 2015-01-01

— BChE activity ( $\times 10^3$  U/l); left axis

— APACHE II score; right axis

- - - SAPS II score; right axis

⋯ SOFA score; right axis

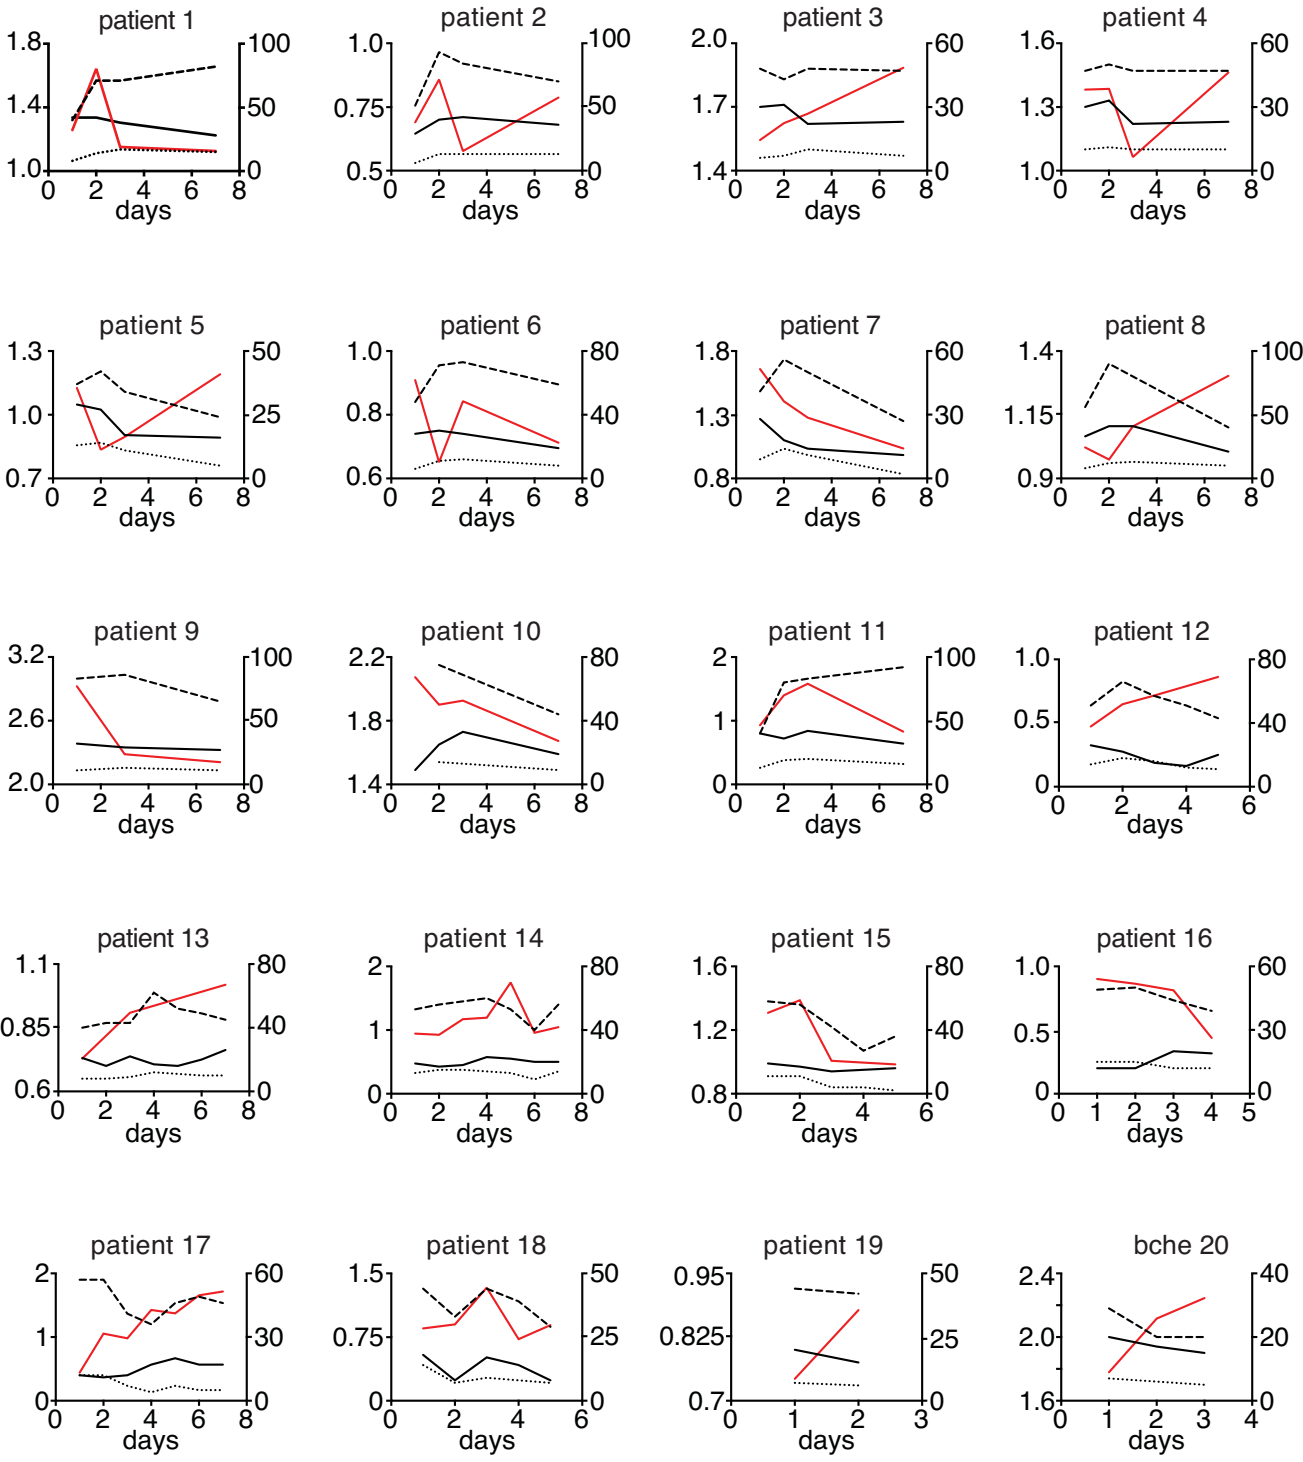

Supplement: f1 [file 274607.f1.pdf]
